# Supplementary material for: Phenotypic and Molecular Characteristics of Carbapenem-Resistant Acinetobacter baumannii Isolates from Bulgarian Intensive Care Unit Patients
Source: MDPI journal article supplement (doi:10.3390/microorganisms11040875), 2023-03-29
Supplement: s1 [file s1]

**Article:** Phenotypic and Molecular Characteristics of Carbapenem-Resistant *Acinetobacter baumannii* Isolates from Bulgarian Intensive Care Unit Patients (Tanya V. Strateva *et al.*)

**Table S1.** Genomes of colistin-susceptible *A. baumannii* isolates ( $n = 66$ ) used to build a phylogenetic tree.

| NCBI Accession Number | Location | Isolation Year |
|-----------------------|----------|----------------|
| GCA_001512055.1       | Greece   | 2002           |
| GCA_001907125.1       | Croatia  | 2009           |
| GCA_001907145.1       | Croatia  | 2003           |
| GCA_001907155.1       | Croatia  | 2013           |
| GCA_002741415.1       | Greece   | 2002           |
| GCA_009710715.1       | Romania  | 2018           |
| GCA_009760525.1       | Greece   | 2016           |
| GCA_013185115.1       | Romania  | 2017           |
| GCA_013185135.1       | Romania  | 2017           |
| GCA_013185155.1       | Romania  | 2017           |
| GCA_016486425.1       | Greece   | 2016           |
| GCA_016486705.1       | Hungary  | 2012           |
| GCA_016487085.1       | Croatia  | 2014           |
| GCA_016487125.1       | Croatia  | 2014           |
| GCA_016487465.1       | Greece   | 2014           |
| GCA_016487525.1       | Greece   | 2014           |
| GCA_016608845.1       | Hungary  | 2017           |
| GCA_016609725.1       | Romania  | 2011           |
| GCA_016609825.1       | Greece   | 2014           |
| GCA_017948835.1       | Greece   | 2015           |
| GCA_017948875.1       | Greece   | 2015           |
| GCA_017953055.1       | Greece   | 2016           |
| GCA_017953075.1       | Greece   | 2016           |
| GCA_017953095.1       | Greece   | 2016           |
| GCA_017953115.1       | Greece   | 2016           |
| GCA_017953125.1       | Greece   | 2015           |
| GCA_017953155.1       | Greece   | 2015           |
| GCA_017953175.1       | Greece   | 2015           |
| GCA_017953185.1       | Greece   | 2014           |
| GCA_017953215.1       | Greece   | 2014           |
| GCA_017953235.1       | Greece   | 2016           |
| GCA_017953255.1       | Greece   | 2016           |
| GCA_017953275.1       | Greece   | 2016           |
| GCA_017953285.1       | Greece   | 2015           |
| GCA_017953315.1       | Greece   | 2016           |
| GCA_017953335.1       | Greece   | 2015           |

---

|                 |                        |      |
|-----------------|------------------------|------|
| GCA_017953355.1 | Greece                 | 2015 |
| GCA_017953375.1 | Greece                 | 2015 |
| GCA_017953395.1 | Greece                 | 2015 |
| GCA_017953415.1 | Greece                 | 2015 |
| GCA_017953435.1 | Greece                 | 2015 |
| GCA_017953455.1 | Greece                 | 2015 |
| GCA_017953475.1 | Greece                 | 2014 |
| GCA_017953495.1 | Greece                 | 2014 |
| GCA_017953515.1 | Greece                 | 2014 |
| GCA_017953535.1 | Greece                 | 2014 |
| GCA_017953555.1 | Greece                 | 2014 |
| GCA_017953575.1 | Greece                 | 2013 |
| GCA_017953595.1 | Greece                 | 2014 |
| GCA_017953615.1 | Greece                 | 2013 |
| GCA_018499935.2 | Hungary                | 2018 |
| GCA_022661895.1 | Croatia                | 2020 |
| GCA_022661905.1 | Croatia                | 2020 |
| GCA_022661915.1 | Croatia                | 2020 |
| GCA_022661955.1 | Croatia                | 2020 |
| GCA_022661975.1 | Croatia                | 2020 |
| GCA_022661995.1 | Croatia                | 2020 |
| GCA_022662025.1 | Croatia                | 2020 |
| GCA_022662035.1 | Croatia                | 2020 |
| GCA_022662055.1 | Croatia                | 2020 |
| GCA_900240205.1 | Bosnia and Herzegovina | 2011 |
| GCA_918811535.1 | Romania                | 2018 |
| GCA_918851115.1 | Romania                | 2018 |
| GCA_918851135.1 | Romania                | 2018 |
| GCA_918856515.1 | Romania                | 2018 |
| GCA_918856805.1 | Romania                | 2018 |

---

NCBI, National Center for Biotechnology Information. *Note:* Isolates closely related to [Aba52](#), [Aba176](#) and [Aba190](#) are color-coded.

**Table S2.** Antimicrobial susceptibility of the studied carbapenem-resistant *A. baumannii* isolates ( $n = 73$ ).

| Antimicrobial<br>agents    | MIC range<br>(mg/L) | MIC <sub>50</sub><br>(mg/L) | MIC <sub>90</sub><br>(mg/L) | Number (percent) of isolates <sup>a</sup> |           |           |
|----------------------------|---------------------|-----------------------------|-----------------------------|-------------------------------------------|-----------|-----------|
|                            |                     |                             |                             | S                                         | I         | R         |
| Imipenem                   | 16 – >32            | >32                         | >32                         | 0 (0)                                     | 0 (0)     | 73 (100)  |
| Meropenem                  | 16 – >32            | >32                         | >32                         | 0 (0)                                     | 0 (0)     | 73 (100)  |
| Amikacin                   | 2 – >256            | >256                        | >256                        | 1 (1.4)                                   | 0 (0)     | 72 (98.6) |
| Gentamicin                 | 0.75 – >256         | >256                        | >256                        | 8 (11)                                    | 0 (0)     | 65 (89)   |
| Tobramycin                 | 0.5 – >256          | >256                        | >256                        | 10 (13.7)                                 | 0 (0)     | 63 (86.3) |
| Levofloxacin               | 4 – >32             | 12                          | >32                         | 0 (0)                                     | 0 (0)     | 73 (100)  |
| SXT (1:19)                 | 0.25 – >256         | 32                          | >256                        | 17 (23.3)                                 | 2 (2.7)   | 54 (74)   |
| Tigecycline <sup>b</sup>   | 0.5 – >256          | 1.5                         | 32                          | 10 (13.7)                                 | 0 (0)     | 63 (86.3) |
| Colistin                   | 0.5 – 1             | 1                           | 1                           | 73 (100)                                  | 0 (0)     | 0 (0)     |
| Ampicillin-sulbactam (1:1) | N/A                 | N/A                         | N/A                         | 51 (69.9)                                 | 12 (16.4) | 10 (13.7) |

MIC, minimum inhibitory concentration; MIC<sub>50/90</sub>, MICs at which 50% and 90% of the isolates are inhibited, respectively; S, susceptible; I, intermediate; R, resistant; SXT, trimethoprim-sulfamethoxazole; N/A, not applicable.

<sup>a</sup> According to European Committee on Antimicrobial Susceptibility Testing (EUCAST) 2019 criteria [34], except for ampicillin-sulbactam that was interpreted according to Clinical and Laboratory Standards Institute (CLSI) 2019 criteria [35].

<sup>b</sup> Interpreted according to the criteria for *Enterobacterales*.
